# Supplementary material
Source: Research Square preprint supplement (doi:10.21203/rs.3.rs-9011244/v1)
Supplement: Supplementary file 1 [file 45ca73aee74d1b24b5d48585.docx]

**Supplementary Material**

**Statistical Analyses**

This research investigates the urban-rural and gender differences in the relationship between the types of social participation and depressive symptoms among older adults. As depressive symptoms were measured as a continuous scale, Ordinary Least Squares (OLS) regression models were employed to estimate the relationships. The models are briefly introduced as follows:

Equation (1) examines the direct effect of different types of social participation (ᵢ) on the depressive symptoms of older adults:

Here, the coefficient reflects the net effect of the type of social participation on the level of depressive symptoms. If β₁ is significantly negative, it indicates that greater social participation is associated with milder depressive symptoms. The coefficients correspond to the control variables (e.g., age, education), which are included to account for confounding effects.

Equation (2) extends Equation (1) by introducing the residence variable and its interaction term with the type of social participation. It tests whether the effect of social participation on the level of depressive symptoms differs between urban and rural areas (rural = 0, urban = 1).

Here, the interaction term coefficient captures the extent to which the effect of social participation type ()varies by residence. Our primary focus is on the statistical significance of , since its significance would indicate that the effect of social participation on the level of depressive symptoms differs between urban and rural areas. For urban older adults, the effect is represented by +, whereas for rural older adults, it is represented by .

Equation （3） builds upon Equation （1） by introducing the gender variable and its interaction term with the type of social participation. This tests whether the effect of social participation on depression levels differs by gender (male=0, female=1).

Equation (3) extends Equation (1) by introducing the gender variable and its interaction term with the type of social participation. It examines whether the effect of social participation on the level of depressive symptoms differs by gender (coded as male = 0, female = 1).

Here, the interaction term coefficient captures the extent to which the effect of social participation type () varies by gender. For female older adults, the effect is represented by +, whereas for male older adults, it is represented by α₁.

**Supplementary Tables**

Table A1: Social Participation Types on Depressive Symptoms from a Full OLS Regression Model

| VARIABLES | Depression | |
| --- | --- | --- |
| Passive Leisure Activities | -0.010 | （0.025） |
| Learning activities | -0.253*** | （0.063） |
| Active Leisure Activities | 0.000 | （0.015） |
| Internet Usage | -0.208*** | （0.025） |
| Community Volunteering | -0.018 | （0.049） |
| Intergenerational domestic support | 0.177*** | （0.029） |
| Intergenerational childcare | -0.378*** | （0.056） |
| Reemployment after Retirement | -0.186*** | （0.061） |
| Electoral Participation | 0.073* | （0.044） |
| Region of Residence（Urban Areas =1） | -0.357*** | （0.078） |
| Age | 0.023*** | （0.006） |
| Gender (Male=1) | 0.122* | （0.073） |
| Educational Attainment (in Years) | -0.037*** | （0.010） |
| Subjective Economic Status | -0.179*** | （0.066） |
| Self-Rated Health | -0.772*** | （0.041） |
| Marital status（Married=1） | -0.217** | （0.088） |
| Caregiving support from offspring | -0.079** | （0.032） |
| Child-provided financial support | -0.088*** | （0.016） |
| Community atmosphere | -0.067*** | （0.008） |
| Constant | 21.022*** | （0.615） |
| Observations | 7,443 | |
| R-squared | 0.153 | |

Note：The table present non-standardized coefficients, with standard errors in parentheses. All models control for age, gender, education, subjective economic status, self-rated health, region of residence. marital status, caregiving support from offspring financial support from children and community atmosphere. *** p<0.01, ** p<0.05, * p<0.1

Table A2: Sensitivity Analysis Using Separate Lagged Dependent Variable (LDV) Models for Developmental Participation

|  | (1) | (2) | (3) | (4) |
| --- | --- | --- | --- | --- |
| VARIABLES | Depression2020 | | | |
| Learning activities | -0.054 |  |  |  |
|  | (0.096) |  |  |  |
| Passive Leisure Activities |  | -0.022 |  |  |
|  |  | (0.024) |  |  |
| Active Leisure Activities |  |  | -0.041*** |  |
|  |  |  | (0.014) |  |
| Internet Usage |  |  |  | -0.128*** |
|  |  |  |  | (0.024) |
| Depression2018 | 0.531*** | 0.531*** | 0.531*** | 0.527*** |
|  | (0.012) | (0.012) | (0.012) | (0.012) |
| Control variables | Controlled | | | |
| Constant | 9.899*** | 9.943*** | 9.907*** | 10.430*** |
|  | (0.605) | (0.607) | (0.605) | (0.612) |
| Observations | 5,626 | 5,626 | 5,626 | 5,626 |
| R-squared | 0.352 | 0.352 | 0.353 | 0.355 |

Note：The table present non-standardized coefficients, with standard errors in parentheses.*** p<0.01, ** p<0.05, * p<0.1

Table A3: Sensitivity Analysis Using Separate Lagged Dependent Variable (LDV) Models for Contributive participation

|  | (5) | (6) | (7) | (8) | (9) |
| --- | --- | --- | --- | --- | --- |
| VARIABLES | depression | depression | depression | depression | depression |
| Community Volunteering | -0.004 |  |  |  |  |
|  | (0.046) |  |  |  |  |
| Intergenerational domestic support |  | 0.166*** |  |  |  |
|  |  | (0.029) |  |  |  |
| Intergenerational childcare |  |  | -0.281*** |  |  |
|  |  |  | (0.058) |  |  |
| Reemployment after Retirement |  |  |  | -0.150** |  |
|  |  |  |  | (0.062) |  |
| Electoral Participation |  |  |  |  | 0.037 |
|  |  |  |  |  | (0.043) |
| Depression2018 | 0.531*** | 0.531*** | 0.530*** | 0.530*** | 0.531*** |
|  | (0.012) | (0.012) | (0.012) | (0.012) | (0.012) |
| Constant | 9.907*** | 9.372*** | 10.826*** | 10.020*** | 9.825*** |
|  | (0.609) | (0.611) | (0.634) | (0.607) | (0.612) |
| Observations | 5,626 | 5,626 | 5,626 | 5,626 | 5,626 |
| R-squared | 0.352 | 0.356 | 0.355 | 0.353 | 0.352 |

Note：The table present non-standardized coefficients, with standard errors in parentheses.*** p<0.01, ** p<0.05, * p<0.1

Table A4: Factors Influencing Types of Social Participation among Older Adults

|  | **Developmental Participation** | | | | **Contributory Participation** | | | | | | |
| --- | --- | --- | --- | --- | --- | --- | --- | --- | --- | --- | --- |
| VARIABLES | Learning activities | Passive Leisure Activities | Active Leisure Activities | Internet Usage | Community Volunteering | Intergenerational domestic support | Intergenerational childcare | | | Reemployment after Retirement | Electoral Participation |
| Region of Residence | 0.074*** | 0.262*** | 0.560*** | 0.459*** | 0.083*** | -0.204*** | | 0.037** | -0.046*** | | -0.083*** |
|  | (0.014) | (0.037) | (0.062) | (0.037) | (0.019) | (0.031) | | (0.016) | (0.015) | | (0.020) |
| Gender | 0.018 | -0.005 | 0.292*** | 0.052 | -0.004 | 0.103*** | | 0.004 | -0.072*** | | -0.084*** |
|  | (0.014) | (0.036) | (0.059) | (0.035) | (0.018) | (0.029) | | (0.015) | (0.014) | | (0.020) |
| Age | -0.005*** | -0.011*** | -0.060*** | -0.072*** | -0.010*** | -0.035*** | | -0.025*** | -0.008*** | | -0.010*** |
|  | (0.001) | (0.003) | (0.005) | (0.003) | (0.001) | (0.002) | | (0.001) | (0.001) | | (0.002) |
| Education | 0.008*** | 0.019*** | 0.065*** | 0.093*** | 0.011*** | 0.019*** | | 0.013*** | 0.008*** | | 0.003 |
|  | (0.002) | (0.005) | (0.008) | (0.005) | (0.002) | (0.004) | | (0.002) | (0.002) | | (0.003) |
| Subjective Economic Status | -0.049*** | 0.071** | 0.011 | -0.022 | 0.008 | 0.042 | | -0.026* | -0.001 | | -0.033* |
|  | (0.013) | (0.032) | (0.054) | (0.032) | (0.016) | (0.027) | | (0.014) | (0.013) | | (0.018) |
| Self-Rated Health | 0.006 | -0.011 | 0.305*** | 0.169*** | -0.004 | 0.014 | | 0.032*** | 0.033*** | | 0.031*** |
|  | (0.008) | (0.020) | (0.033) | (0.020) | (0.010) | (0.016) | | (0.008) | (0.008) | | (0.011) |
| Marital status | -0.017 | -0.004 | 0.163** | 0.048 | 0.015 | -0.059* | | -0.037** | -0.018 | | -0.021 |
|  | (0.017) | (0.043) | (0.072) | (0.042) | (0.022) | (0.035) | | (0.018) | (0.017) | | (0.024) |
| Caregiving  support from children | 0.019*** | 0.231*** | 0.186*** | 0.077*** | 0.028*** | 0.394*** | | 0.010* | 0.004 | | -0.041*** |
|  | (0.006) | (0.014) | (0.024) | (0.014) | (0.007) | (0.012) | | (0.006) | (0.006) | | (0.008) |
| Child-provided financial support | 0.009*** | 0.007 | 0.055*** | 0.072*** | 0.012*** | 0.010 | | 0.006** | -0.010*** | | 0.008** |
|  | (0.003) | (0.008) | (0.013) | (0.008) | (0.004) | (0.006) | | (0.003) | (0.003) | | (0.004) |
| Community atmosphere | 0.001 | 0.023*** | 0.069*** | 0.029*** | -0.013*** | -0.007** | | -0.012*** | -0.004*** | | 0.021*** |
|  | (0.001) | (0.004) | (0.006) | (0.004) | (0.002) | (0.003) | | (0.002) | (0.001) | | (0.002) |
| Constant | 0.346*** | 2.018*** | 1.067** | 4.270*** | 1.154*** | 3.342*** | | 3.277*** | 0.755*** | | 2.293*** |
|  | (0.107) | (0.276) | (0.461) | (0.272) | (0.139) | (0.228) | | (0.118) | (0.108) | | (0.152) |
| R-squared | 0.023 | 0.065 | 0.131 | 0.276 | 0.031 | 0.168 | | 0.096 | 0.023 | | 0.032 |

Note：N = 7,443.The table present non-standardized coefficients, with standard errors in parentheses. *** p<0.01, ** p<0.05, * p<0.1
